# Supplementary material for: Tip-Flexible Suctioning Ureteral Access Sheath Combined with Flexible Ureteroscope: a single-institution experience including in vitro experiments
Source: Research Square preprint supplement (doi:10.21203/rs.3.rs-6812666/v1), 2025-06-18
Supplement: Supplementary file 1 [file 04aae218c2bd7df6676ca11a.xlsx]

## Sheet: Sheet1
Supplementary Table 1. Comparisons of surgical outcomes and postoperative clinical characteristics between the two groups
Variables, mean±SD or n(%)			T-UAS		TFS-UAS		P value
Total number,(n)			134		62
Operative time, (min)			48.83±22.91		55.23±23.53		0.073
Hemoglobin decrease, (g/L)			2.69±8.83		2.00±9.54		0.622
WBC increase, (*109/L)			2.08±3.27		1.21±3.15		0.079
BUN decrease, (mmol/L)			0.86±2.84		0.67±1.91		0.385
Scr decrease, (umol/L)			3.18±15.78		2.11±14.59		0.654
Hospital stay, (days)			3.10±0.45		3.15±0.51		0.571
Initial SFR (Immediately after surgery)	Yes		17(12.69)		8(12.90)		0.966
	No		117(87.31)		54(87.10)
Total SFR (postoperative 2d week)	Yes		34(25.37)		13(20.97)		0.502
	No		100(74.63)		49(79.03)
Complications
Fever			3(2.24)		1(1.61)		1
Pain			5(3.73)		1(1.61)		0.667
BUN Blood Urea Nitrogen, Scr Serum creatinine, SFR stone free rate, SD standard deviation
