# Supplementary material for: Tip-Flexible Suctioning Ureteral Access Sheath Combined with Flexible Ureteroscope: a single-institution experience including in vitro experiments
Source: Research Square preprint supplement (doi:10.21203/rs.3.rs-6812666/v1), 2025-06-18
Supplement: Supplementary file 2 [file 3fff5280c3196c0952277ac4.xlsx]

## Sheet: Sheet1
Table 1. Patient’s preoperative clinical data between the two groups
Variables, mean ±SD or n(%)		T-UAS	TFS-UAS	P value
Total number, (n)		134	62
Age(years)		49.72±13.82	56.87±13.28	0.001
BMI(kg/m2)		24.77±3.09	24.57±3.23	0.682
Gender, n(%)	Male	107(79.85)	39(62.90)	0.011
	Female	27(20.15)	23(37.10)
Preoperative urine culture, n(%)	Negative	126(94.03)	59(95.16)	1
	Positive	8(5.97)	3(4.84)
Preoperative urine routines, n(%)	Negative	75(55.97)	31(50.00)	0.407
	1+	36(26.87)	15(24.19)
	2+	11(8.21)	10(16.13)
	3+	12(8.96)	6(9.68)
Maximum stone size, cm		12.56±5.14	17.73±7.79	<0.001
Maximum CT value		778.39±513.46	1156.52±420.15	<0.001
the STONE score		7.37±2.28	10.86±2.51	<0.001
Preoperative Double stent, n(%)	YES	24(17.91)	36(58.06)	<0.001
	NO	110(82.09)	26(41.94)
BMI body mass index, SD standard deviation
