# Supplementary material for: Tip-Flexible Suctioning Ureteral Access Sheath Combined with Flexible Ureteroscope: a single-institution experience including in vitro experiments
Source: Research Square preprint supplement (doi:10.21203/rs.3.rs-6812666/v1), 2025-06-18
Supplement: Supplementary file 3 [file 43df1aa8684c6c946ea24cad.xlsx]

## Sheet: Sheet1
Supplementary Table 2. Patient’s demographics and preoperative clinical data between the two groups
Variables, mean ±SD or n(%)			T-UAS		TFS-UAS		P value
Total number,(n)			41		37
Age(years)			48.24±14.74		59.14±11.57		0.001
BMI(kg/m2)			24.93±3.49		24.47±3.29		0.557
Gender,n(%)	Male		34(82.93)		28(75.68)		0.428
	Female		7(17.07)		9(24.32)
Preoperative urine culture, n (%)	Negative		37(90.24		35(94.59)		0.768
	Positive		4(9.76)		2(5.41)
Preoperative urine routines, n (%)	Negative		19(46.34)		17(45.95)		0.547
	1+		10(24.39)		11(29.73)
	2+		6(14.63)		7(18.92)
	3+		6(14.63)		2(5.41)
Maximum stone size,cm			18.70±3.82		22.57±6.35		0.001
Maximum CT value			896.56±465.33		1160.76±382.84		0.007
the STONE score			8.63±2.31		11.43±2.40		<0.001
Preoperative Double stent, n(%)	NO		37(90.24)		19(51.35)		<0.001
	YES		4(9.76)		18(48.65)
BMI body mass index, SD standard deviation
