# Supplementary material for: Tip-Flexible Suctioning Ureteral Access Sheath Combined with Flexible Ureteroscope: a single-institution experience including in vitro experiments
Source: Research Square preprint supplement (doi:10.21203/rs.3.rs-6812666/v1), 2025-06-18
Supplement: Supplementary file 4 [file c1e1618cb2c44cabd8704bee.xlsx]

## Sheet: Sheet1
Table 2. Comparisons of surgical outcomes and postoperative clinical characteristics between the two groups
Variables, mean±SD or n(%)		T-UAS	TFS-UAS	P value
Total number, (n)		41	37
Operative time, (min)		65.76±22.43	53.92±21.77	0.021
Hemoglobin decrease, (g/L)		2.44±9.39	2.08±8.73	0.862
WBC increase, (*109/L)		2.42±3.05	1.59±3.32	0.258
BUN decrease, (mmol/L)		0.63±1.31	0.64±2.22	0.977
Scr decrease, (umol/L)		(-0.66)±18.17	0.07±16.25	0.851
Hospital stay, (days)		3.27±0.67	3.08±0.43	0.144
Initial SFR (Immediately after surgery)	Yes	11(26.83)	3(8.11)	0.063
	No	30(73.17)	34(91.89)
Total SFR (postoperative 2d week)	Yes	18(43.90)	7(18.92)	0.018
	No	23(56.10)	30(81.08)
Complications
Fever		2(4.88)	1(2.70)	1
Pain		2(4.88)	1(2.70)	1
BUN Blood Urea Nitrogen, Scr Serum creatinine, SFR stone free rate, SD standard deviation
